# Supplementary material
Source: PubMed Central journal article supplement (PMC3255866)

# The Effects of Host Age on the Transport of Complement-Bound Complexes to the Spleen and the Pathogenesis of Intravenous Scrapie Infection

Running title: Effect of host age on intravenous prion infection

**Karen L. Brown, Anton Gossner, Simon Mok and Neil A. Mabbott**

**Supplementary Figure 1.** Comparison of *C4b* mRNA expression in murine tissues and cells.

(A) Expression profile of *C4b* (which encodes complement component C4; probe set ID 1418021\_at) and *Alb* (which encodes albumin; probe set ID 1425260\_at) across 95 individual microarray data sets representing a wide range of mouse tissues and cell-lineages. All sample analysis was performed on the Affymetrix MOE430 2.0 expression array. Data were analysed using the GNF1M Mouse tissue atlas (<http://biogps.gnf.org>). Detailed conditions of the cell and tissue preparation and treatment are available in the above study. Normalised gene expression level data for each tissue and cell type are shown. These data show that the liver is the major site of *C4b* expression.

(B) Comparison of *C4b* expression levels (probe set 1418021\_at) by FDC and the liver. Publicly available gene expression data sets performed on Affymetrix MOE430 2.0 expression arrays were download and normalised using RMA (Affymetrix, Santa Clara, CA). The chip identification accession numbers for each data set are indicated: FDC, RMLNDC002001, RMLNDC003001; Liver, GSM258687, GSM258688.

A

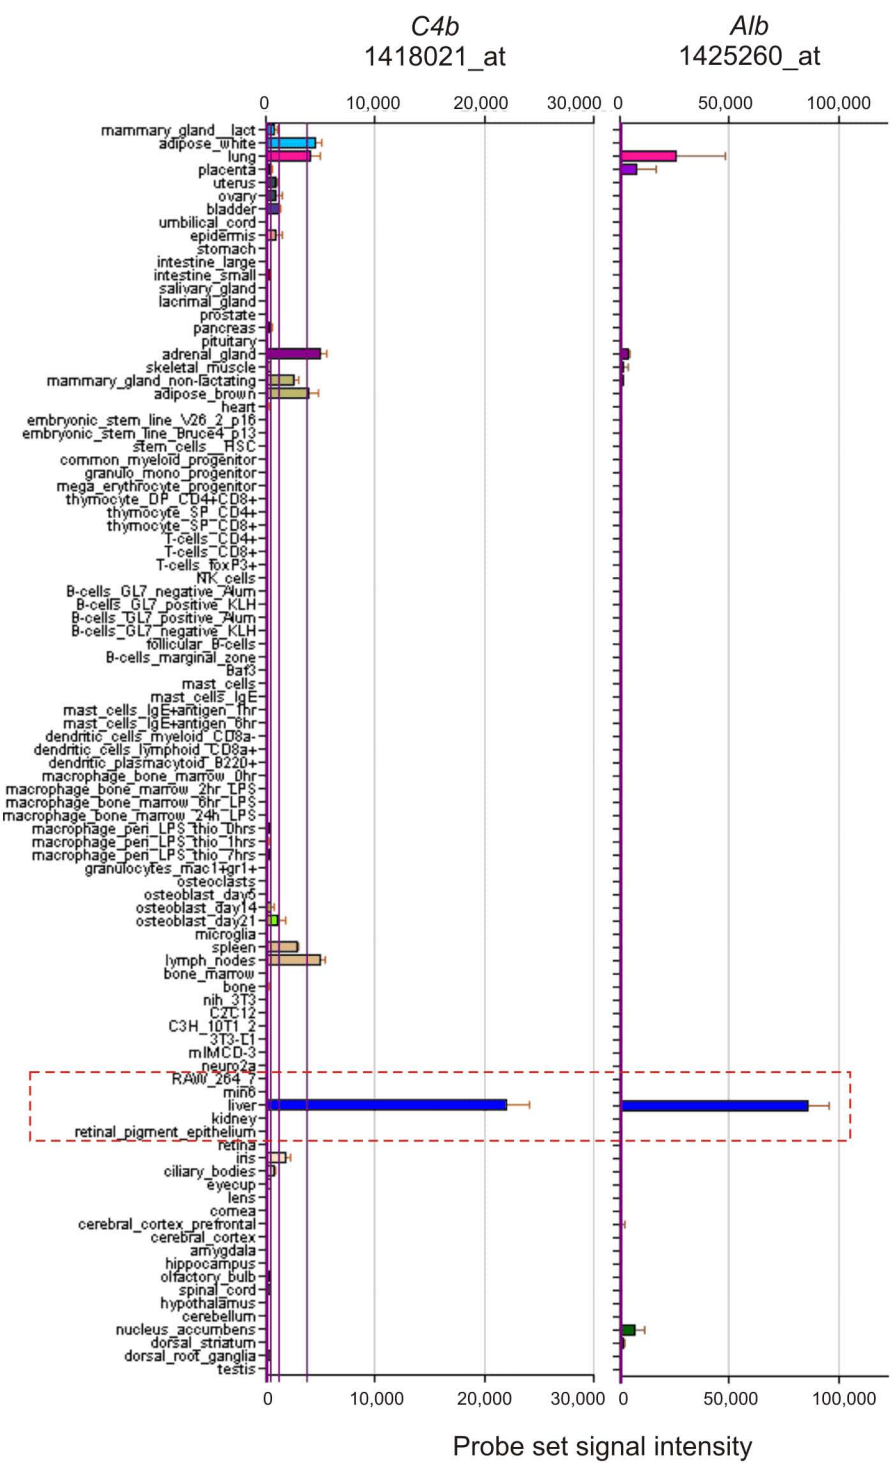

B

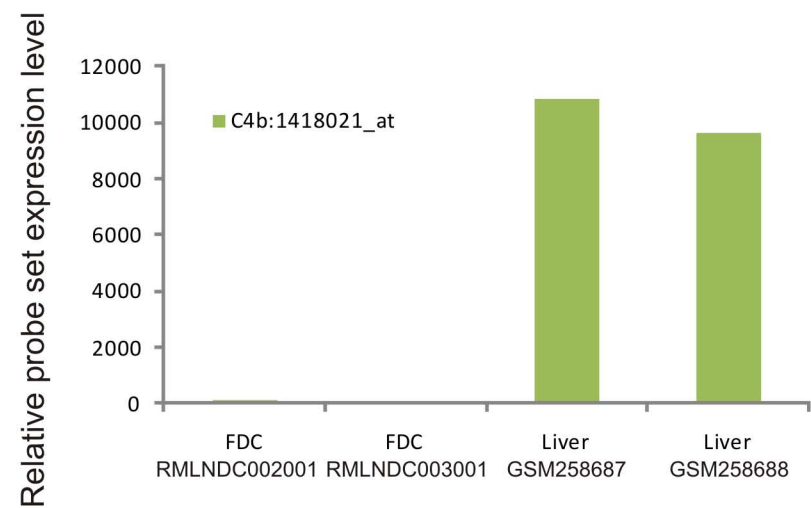

Supplement: supp_86.1.25_FigS1.pdf [file supp_86.1.25_FigS1.pdf]
